# Supplementary material for: Development of MDS in Pediatric Patients with GATA2 Deficiency: Increased Histone Trimethylation and Deregulated Apoptosis as Potential Drivers of Transformation
Source: MDPI journal article supplement (doi:10.3390/cancers15235594), 2023-11-26
Supplement: s1 [file s1]

| Gene name | Type  | ProbeID        |
|-----------|-------|----------------|
| A2M       | Probe | NM_000014.4    |
| ABCB1     | Probe | NM_000927.3    |
| ABL1      | Probe | NM_005157.3    |
| ADA       | Probe | NM_000022.2    |
| ADORA2A   | Probe | NM_000675.3    |
| AICDA     | Probe | NM_020661.1    |
| AIRE      | Probe | NM_000383.2    |
| AKT3      | Probe | NM_181690.1    |
| ALCAM     | Probe | NM_001627.3    |
| AMBP      | Probe | NM_001633.3    |
| AMICA1    | Probe | NM_153206.2    |
| ANP32B    | Probe | NM_006401.2    |
| ANXA1     | Probe | NM_000700.1    |
| APOE      | Probe | NM_000041.2    |
| APP       | Probe | NM_000484.3    |
| ARG1      | Probe | NM_000045.2    |
| ARG2      | Probe | NM_001172.3    |
| ATF1      | Probe | NM_005171.2    |
| ATF2      | Probe | NM_001256090.1 |
| ATG10     | Probe | NM_001131028.1 |
| ATG12     | Probe | NM_004707.2    |
| ATG16L1   | Probe | NM_198890.2    |
| ATG5      | Probe | NM_004849.2    |
| ATG7      | Probe | NM_001136031.2 |
| ATM       | Probe | NM_000051.3    |
| AXL       | Probe | NM_021913.2    |
| BAGE      | Probe | NM_001187.1    |
| BATF      | Probe | NM_006399.3    |
| BAX       | Probe | NM_138761.3    |
| BCL10     | Probe | NM_003921.2    |
| BCL2      | Probe | NM_000657.2    |
| BCL2L1    | Probe | NM_001191.2    |
| BCL6      | Probe | NM_001706.2    |
| BID       | Probe | NM_001196.2    |
| BIRC5     | Probe | NM_001168.2    |
| BLK       | Probe | NM_001715.2    |
| BLNK      | Probe | NM_013314.2    |
| BMI1      | Probe | NM_005180.5    |
| BST1      | Probe | NM_004334.2    |
| BST2      | Probe | NM_004335.2    |
| BTK       | Probe | NM_000061.1    |
| BTLA      | Probe | NM_181780.2    |
| C1QA      | Probe | NM_015991.2    |
| C1QB      | Probe | NM_000491.3    |
| C1QBP     | Probe | NM_001212.3    |

|        |       |                |
|--------|-------|----------------|
| C1R    | Probe | NM_001733.4    |
| C1S    | Probe | NM_001734.2    |
| C2     | Probe | NM_000063.3    |
| C3     | Probe | NM_000064.2    |
| C3AR1  | Probe | NM_004054.2    |
| C4B    | Probe | NM_001002029.3 |
| C4BPA  | Probe | NM_000715.3    |
| C5     | Probe | NM_001735.2    |
| C6     | Probe | NM_000065.2    |
| C7     | Probe | NM_000587.2    |
| C8A    | Probe | NM_000562.2    |
| C8B    | Probe | NM_000066.2    |
| C8G    | Probe | NM_000606.2    |
| C9     | Probe | NM_001737.3    |
| CAMP   | Probe | NM_004345.3    |
| CARD11 | Probe | NM_032415.2    |
| CARD9  | Probe | NM_052813.4    |
| CASP1  | Probe | NM_001223.3    |
| CASP10 | Probe | NM_032977.3    |
| CASP3  | Probe | NM_032991.2    |
| CASP8  | Probe | NM_001228.4    |
| CCL1   | Probe | NM_002981.1    |
| CCL11  | Probe | NM_002986.2    |
| CCL13  | Probe | NM_005408.2    |
| CCL14  | Probe | NM_032963.3    |
| CCL15  | Probe | NM_032965.3    |
| CCL16  | Probe | NM_004590.2    |
| CCL17  | Probe | NM_002987.2    |
| CCL18  | Probe | NM_002988.2    |
| CCL19  | Probe | NM_006274.2    |
| CCL2   | Probe | NM_002982.3    |
| CCL20  | Probe | NM_004591.1    |
| CCL21  | Probe | NM_002989.2    |
| CCL22  | Probe | NM_002990.3    |
| CCL23  | Probe | NM_145898.1    |
| CCL24  | Probe | NM_002991.2    |
| CCL25  | Probe | NM_005624.2    |
| CCL26  | Probe | NM_006072.4    |
| CCL27  | Probe | NM_006664.2    |
| CCL28  | Probe | NM_148672.2    |
| CCL3   | Probe | NM_002983.2    |
| CCL3L1 | Probe | NM_021006.4    |
| CCL4   | Probe | NM_002984.2    |
| CCL5   | Probe | NM_002985.2    |
| CCL7   | Probe | NM_006273.2    |
| CCL8   | Probe | NM_005623.2    |

|        |       |                |
|--------|-------|----------------|
| CCND3  | Probe | NM_001760.2    |
| CCR1   | Probe | NM_001295.2    |
| CCR2   | Probe | NM_001123041.2 |
| CCR3   | Probe | NM_001837.2    |
| CCR4   | Probe | NM_005508.4    |
| CCR5   | Probe | NM_000579.1    |
| CCR6   | Probe | NM_031409.2    |
| CCR7   | Probe | NM_001838.2    |
| CCR9   | Probe | NM_031200.1    |
| CCRL2  | Probe | NM_003965.4    |
| CD14   | Probe | NM_000591.2    |
| CD160  | Probe | NM_007053.2    |
| CD163  | Probe | NM_004244.4    |
| CD164  | Probe | NM_006016.4    |
| CD180  | Probe | NM_005582.2    |
| CD19   | Probe | NM_001770.4    |
| CD1A   | Probe | NM_001763.2    |
| CD1B   | Probe | NM_001764.2    |
| CD1C   | Probe | NM_001765.2    |
| CD1D   | Probe | NM_001766.3    |
| CD1E   | Probe | NM_001042583.1 |
| CD2    | Probe | NM_001767.3    |
| CD200  | Probe | NM_005944.5    |
| CD207  | Probe | NM_015717.2    |
| CD209  | Probe | NM_021155.2    |
| CD22   | Probe | NM_001771.2    |
| CD24   | Probe | NM_013230.2    |
| CD244  | Probe | NM_016382.2    |
| CD247  | Probe | NM_198053.1    |
| CD27   | Probe | NM_001242.4    |
| CD274  | Probe | NM_014143.3    |
| CD276  | Probe | NM_001024736.1 |
| CD28   | Probe | NM_001243078.1 |
| CD33   | Probe | NM_001177608.1 |
| CD34   | Probe | NM_001025109.1 |
| CD36   | Probe | NM_001001548.2 |
| CD37   | Probe | NM_001774.2    |
| CD38   | Probe | NM_001775.2    |
| CD3D   | Probe | NM_000732.4    |
| CD3E   | Probe | NM_000733.2    |
| CD3EAP | Probe | NM_012099.1    |
| CD3G   | Probe | NM_000073.2    |
| CD4    | Probe | NM_000616.4    |
| CD40   | Probe | NM_001250.4    |
| CD40LG | Probe | NM_000074.2    |
| CD44   | Probe | NM_001001392.1 |

|         |       |                |
|---------|-------|----------------|
| CD46    | Probe | NM_172350.1    |
| CD47    | Probe | NM_001777.3    |
| CD48    | Probe | NM_001778.2    |
| CD5     | Probe | NM_014207.2    |
| CD53    | Probe | NM_001040033.1 |
| CD55    | Probe | NM_000574.3    |
| CD58    | Probe | NM_001779.2    |
| CD59    | Probe | NM_000611.4    |
| CD6     | Probe | NM_006725.3    |
| CD63    | Probe | NM_001780.4    |
| CD68    | Probe | NM_001251.2    |
| CD7     | Probe | NM_006137.6    |
| CD70    | Probe | NM_001252.2    |
| CD74    | Probe | NM_001025159.1 |
| CD79A   | Probe | NM_001783.3    |
| CD79B   | Probe | NM_021602.2    |
| CD80    | Probe | NM_005191.3    |
| CD81    | Probe | NM_004356.3    |
| CD83    | Probe | NM_004233.3    |
| CD84    | Probe | NM_001184879.1 |
| CD86    | Probe | NM_175862.3    |
| CD8A    | Probe | NM_001768.5    |
| CD8B    | Probe | NM_004931.3    |
| CD9     | Probe | NM_001769.2    |
| CD96    | Probe | NM_005816.4    |
| CD97    | Probe | NM_078481.2    |
| CD99    | Probe | NM_002414.3    |
| CDH1    | Probe | NM_004360.2    |
| CDH5    | Probe | NM_001795.3    |
| CDK1    | Probe | NM_001786.4    |
| CDKN1A  | Probe | NM_000389.2    |
| CEACAM1 | Probe | NM_001712.3    |
| CEACAM6 | Probe | NM_002483.4    |
| CEACAM8 | Probe | NM_001816.3    |
| CEBPB   | Probe | NM_005194.2    |
| CFB     | Probe | NM_001710.5    |
| CFD     | Probe | NM_001928.2    |
| CFI     | Probe | NM_000204.3    |
| CFP     | Probe | NM_002621.2    |
| CHIT1   | Probe | NM_003465.2    |
| CHUK    | Probe | NM_001278.3    |
| CKLF    | Probe | NM_181640.2    |
| CLEC4A  | Probe | NM_194448.2    |
| CLEC4C  | Probe | NM_203503.1    |
| CLEC5A  | Probe | NM_013252.2    |
| CLEC6A  | Probe | NM_001007033.1 |

|         |       |                |
|---------|-------|----------------|
| CLEC7A  | Probe | NM_197954.2    |
| CLU     | Probe | NM_001831.2    |
| CMA1    | Probe | NM_001836.2    |
| CMKLR1  | Probe | NM_004072.1    |
| COL3A1  | Probe | NM_000090.3    |
| COLEC12 | Probe | NM_130386.2    |
| CR1     | Probe | NM_000651.4    |
| CR2     | Probe | NM_001006658.1 |
| CREB1   | Probe | NM_004379.3    |
| CREB5   | Probe | NM_182898.2    |
| CREBBP  | Probe | NM_004380.2    |
| CRP     | Probe | NM_000567.2    |
| CSF1    | Probe | NM_000757.4    |
| CSF1R   | Probe | NM_005211.2    |
| CSF2    | Probe | NM_000758.2    |
| CSF2RB  | Probe | NM_000395.2    |
| CSF3    | Probe | NM_000759.3    |
| CSF3R   | Probe | NM_156038.2    |
| CT45A1  | Probe | NM_001017417.1 |
| CTAG1B  | Probe | NM_001327.2    |
| CTAGE1  | Probe | NM_172241.2    |
| CTCFL   | Probe | NM_001269042.1 |
| CTLA4   | Probe | NM_005214.3    |
| CTSG    | Probe | NM_001911.2    |
| CTSH    | Probe | NM_004390.3    |
| CTSL    | Probe | NM_001912.4    |
| CTSS    | Probe | NM_004079.3    |
| CTSW    | Probe | NM_001335.3    |
| CX3CL1  | Probe | NM_002996.3    |
| CX3CR1  | Probe | NM_001337.3    |
| CXCL1   | Probe | NM_001511.1    |
| CXCL10  | Probe | NM_001565.1    |
| CXCL11  | Probe | NM_005409.4    |
| CXCL12  | Probe | NM_000609.5    |
| CXCL13  | Probe | NM_006419.2    |
| CXCL14  | Probe | NM_004887.4    |
| CXCL16  | Probe | NM_001100812.1 |
| CXCL2   | Probe | NM_002089.3    |
| CXCL3   | Probe | NM_002090.2    |
| CXCL5   | Probe | NM_002994.3    |
| CXCL6   | Probe | NM_002993.3    |
| CXCL9   | Probe | NM_002416.1    |
| CXCR1   | Probe | NM_000634.2    |
| CXCR2   | Probe | NM_001557.2    |
| CXCR3   | Probe | NM_001504.1    |
| CXCR4   | Probe | NM_003467.2    |

|        |       |                |
|--------|-------|----------------|
| CXCR5  | Probe | NM_001716.3    |
| CXCR6  | Probe | NM_006564.1    |
| CYBB   | Probe | NM_000397.3    |
| CYFIP2 | Probe | NM_001037332.2 |
| CYLD   | Probe | NM_015247.1    |
| DDX43  | Probe | NM_018665.2    |
| DDX58  | Probe | NM_014314.3    |
| DEFB1  | Probe | NM_005218.3    |
| DMBT1  | Probe | NM_007329.2    |
| DOCK9  | Probe | NM_001130048.1 |
| DPP4   | Probe | NM_001935.3    |
| DUSP4  | Probe | NM_057158.2    |
| DUSP6  | Probe | NM_001946.2    |
| EBI3   | Probe | NM_005755.2    |
| ECSIT  | Probe | NM_001142464.2 |
| EGR1   | Probe | NM_001964.2    |
| EGR2   | Probe | NM_000399.3    |
| ELANE  | Probe | NM_001972.2    |
| ELK1   | Probe | NM_005229.3    |
| ENG    | Probe | NM_001114753.1 |
| ENTPD1 | Probe | NM_001098175.1 |
| EOMES  | Probe | NM_005442.2    |
| EP300  | Probe | NM_001429.2    |
| EPCAM  | Probe | NM_002354.1    |
| ETS1   | Probe | NM_005238.3    |
| EWSR1  | Probe | NM_013986.3    |
| F12    | Probe | NM_000505.3    |
| F13A1  | Probe | NM_000129.3    |
| F2RL1  | Probe | NM_005242.3    |
| FADD   | Probe | NM_003824.2    |
| FAS    | Probe | NM_000043.3    |
| FCER1A | Probe | NM_002001.2    |
| FCER1G | Probe | NM_004106.1    |
| FCER2  | Probe | NM_002002.4    |
| FCGR1A | Probe | NM_000566.3    |
| FCGR2A | Probe | NM_021642.3    |
| FCGR2B | Probe | NM_001002273.1 |
| FCGR3A | Probe | NM_000569.6    |
| FEZ1   | Probe | NM_005103.4    |
| FLT3   | Probe | NM_004119.1    |
| FLT3LG | Probe | NM_001459.3    |
| FN1    | Probe | NM_212482.1    |
| FOS    | Probe | NM_005252.2    |
| FOXJ1  | Probe | NM_001454.3    |
| FOXP3  | Probe | NM_014009.3    |
| FPR2   | Probe | NM_001462.3    |

|          |       |                |
|----------|-------|----------------|
| FUT5     | Probe | NM_002034.2    |
| FUT7     | Probe | NM_004479.3    |
| FYN      | Probe | NM_002037.3    |
| GAGE1    | Probe | NM_001040663.2 |
| GATA3    | Probe | NM_001002295.1 |
| GNLY     | Probe | NM_006433.2    |
| GPI      | Probe | NM_000175.2    |
| GTF3C1   | Probe | NM_001520.3    |
| GZMA     | Probe | NM_006144.2    |
| GZMB     | Probe | NM_004131.3    |
| GZMH     | Probe | NM_033423.3    |
| GZMK     | Probe | NM_002104.2    |
| GZMM     | Probe | NM_005317.2    |
| HAMP     | Probe | NM_021175.2    |
| HAVCR2   | Probe | NM_032782.3    |
| HCK      | Probe | NM_002110.2    |
| HLA-A    | Probe | NM_002116.5    |
| HLA-B    | Probe | NM_005514.6    |
| HLA-C    | Probe | NM_002117.4    |
| HLA-DMA  | Probe | NM_006120.3    |
| HLA-DMB  | Probe | NM_002118.3    |
| HLA-DOB  | Probe | NM_002120.3    |
| HLA-DPA1 | Probe | NM_033554.2    |
| HLA-DPB1 | Probe | NM_002121.4    |
| HLA-DQA1 | Probe | NM_002122.3    |
| HLA-DQB1 | Probe | NM_002123.3    |
| HLA-DRA  | Probe | NM_019111.3    |
| HLA-DRB3 | Probe | NM_022555.3    |
| HLA-DRB4 | Probe | NM_021983.4    |
| HLA-E    | Probe | NM_005516.4    |
| HLA-G    | Probe | NM_002127.4    |
| HMGB1    | Probe | NM_002128.4    |
| HRAS     | Probe | NM_005343.2    |
| HSD11B1  | Probe | NM_181755.1    |
| ICAM1    | Probe | NM_000201.2    |
| ICAM2    | Probe | NM_000873.3    |
| ICAM3    | Probe | NM_002162.3    |
| ICAM4    | Probe | NM_001039132.1 |
| ICOS     | Probe | NM_012092.2    |
| ICOSLG   | Probe | NM_015259.4    |
| IDO1     | Probe | NM_002164.3    |
| IFI16    | Probe | NM_005531.1    |
| IFI27    | Probe | NM_005532.3    |
| IFI35    | Probe | NM_005533.3    |
| IFIH1    | Probe | NM_022168.2    |
| IFIT1    | Probe | NM_001548.3    |

|         |       |             |
|---------|-------|-------------|
| IFIT2   | Probe | NM_001547.4 |
| IFITM1  | Probe | NM_003641.3 |
| IFITM2  | Probe | NM_006435.2 |
| IFNA1   | Probe | NM_024013.1 |
| IFNA17  | Probe | NM_021268.2 |
| IFNA2   | Probe | NM_000605.3 |
| IFNA7   | Probe | NM_021057.2 |
| IFNA8   | Probe | NM_002170.3 |
| IFNAR1  | Probe | NM_000629.2 |
| IFNAR2  | Probe | NM_000874.3 |
| IFNB1   | Probe | NM_002176.2 |
| IFNG    | Probe | NM_000619.2 |
| IFNGR1  | Probe | NM_000416.1 |
| IFNL1   | Probe | NM_172140.1 |
| IFNL2   | Probe | NM_172138.1 |
| IGF1R   | Probe | NM_000875.2 |
| IGF2R   | Probe | NM_000876.1 |
| IGLL1   | Probe | NM_020070.2 |
| IKBKB   | Probe | NM_001556.1 |
| IKBKE   | Probe | NM_014002.2 |
| IKBKG   | Probe | NM_003639.2 |
| IL10    | Probe | NM_000572.2 |
| IL10RA  | Probe | NM_001558.2 |
| IL11    | Probe | NM_000641.2 |
| IL11RA  | Probe | NM_147162.1 |
| IL12A   | Probe | NM_000882.2 |
| IL12B   | Probe | NM_002187.2 |
| IL12RB1 | Probe | NM_005535.1 |
| IL12RB2 | Probe | NM_001559.2 |
| IL13    | Probe | NM_002188.2 |
| IL13RA1 | Probe | NM_001560.2 |
| IL13RA2 | Probe | NM_000640.2 |
| IL15    | Probe | NM_172174.1 |
| IL15RA  | Probe | NM_002189.2 |
| IL16    | Probe | NM_004513.4 |
| IL17A   | Probe | NM_002190.2 |
| IL17B   | Probe | NM_014443.2 |
| IL17F   | Probe | NM_052872.3 |
| IL17RA  | Probe | NM_014339.6 |
| IL17RB  | Probe | NM_018725.3 |
| IL18    | Probe | NM_001562.2 |
| IL18R1  | Probe | NM_003855.2 |
| IL18RAP | Probe | NM_003853.2 |
| IL19    | Probe | NM_013371.3 |
| IL1A    | Probe | NM_000575.3 |
| IL1B    | Probe | NM_000576.2 |



|          |       |                |
|----------|-------|----------------|
| IL1R1    | Probe | NM_000877.2    |
| IL1R2    | Probe | NM_173343.1    |
| IL1RAP   | Probe | NM_002182.2    |
| IL1RAPL2 | Probe | NM_017416.1    |
| IL1RL1   | Probe | NM_016232.4    |
| IL1RL2   | Probe | NM_003854.2    |
| IL1RN    | Probe | NM_000577.3    |
| IL2      | Probe | NM_000586.2    |
| IL21     | Probe | NM_021803.2    |
| IL21R    | Probe | NM_021798.2    |
| IL22     | Probe | NM_020525.4    |
| IL22RA1  | Probe | NM_021258.2    |
| IL22RA2  | Probe | NM_181310.1    |
| IL23A    | Probe | NM_016584.2    |
| IL23R    | Probe | NM_144701.2    |
| IL24     | Probe | NM_181339.1    |
| IL25     | Probe | NM_022789.2    |
| IL26     | Probe | NM_018402.1    |
| IL27     | Probe | NM_145659.3    |
| IL2RA    | Probe | NM_000417.1    |
| IL2RB    | Probe | NM_000878.2    |
| IL2RG    | Probe | NM_000206.1    |
| IL3      | Probe | NM_000588.3    |
| IL32     | Probe | NM_004221.4    |
| IL34     | Probe | NM_152456.1    |
| IL3RA    | Probe | NM_002183.2    |
| IL4      | Probe | NM_000589.2    |
| IL4R     | Probe | NM_000418.2    |
| IL5      | Probe | NM_000879.2    |
| IL5RA    | Probe | NM_000564.3    |
| IL6      | Probe | NM_000600.1    |
| IL6R     | Probe | NM_000565.2    |
| IL6ST    | Probe | NM_002184.2    |
| IL7      | Probe | NM_000880.2    |
| IL7R     | Probe | NM_002185.2    |
| IL8      | Probe | NM_000584.2    |
| IL9      | Probe | NM_000590.1    |
| ILF3     | Probe | NM_001137673.1 |
| INPP5D   | Probe | NM_005541.3    |
| IRAK1    | Probe | NM_001569.3    |
| IRAK2    | Probe | NM_001570.3    |
| IRAK4    | Probe | NM_016123.1    |
| IRF1     | Probe | NM_002198.1    |
| IRF2     | Probe | NM_002199.3    |
| IRF3     | Probe | NM_001571.5    |
| IRF4     | Probe | NM_002460.1    |

|                           |       |                |
|---------------------------|-------|----------------|
| IRF5                      | Probe | NM_002200.3    |
| IRF7                      | Probe | NM_001572.3    |
| IRF8                      | Probe | NM_002163.2    |
| IRGM                      | Probe | NM_001145805.1 |
| ISG15                     | Probe | NM_005101.3    |
| ISG20                     | Probe | NM_002201.4    |
| ITCH                      | Probe | NM_001257138.1 |
| ITGA1                     | Probe | NM_181501.1    |
| ITGA2                     | Probe | NM_002203.2    |
| ITGA2B                    | Probe | NM_000419.3    |
| ITGA4                     | Probe | NM_000885.4    |
| ITGA5                     | Probe | NM_002205.2    |
| ITGA6                     | Probe | NM_000210.1    |
| ITGAE                     | Probe | NM_002208.4    |
| ITGAL                     | Probe | NM_002209.2    |
| ITGAM                     | Probe | NM_000632.3    |
| ITGAX                     | Probe | NM_000887.3    |
| ITGB1                     | Probe | NM_033666.2    |
| ITGB2                     | Probe | NM_000211.2    |
| ITGB3                     | Probe | NM_000212.2    |
| ITGB4                     | Probe | NM_001005731.1 |
| ITK                       | Probe | NM_005546.3    |
| JAK1                      | Probe | NM_002227.1    |
| JAK2                      | Probe | NM_004972.2    |
| JAK3                      | Probe | NM_000215.2    |
| JAM3                      | Probe | NM_032801.3    |
| KIR_Activating_Subgroup_1 | Probe | NM_001083539.1 |
| KIR_Activating_Subgroup_2 | Probe | NM_014512.1    |
| KIR_Inhibiting_Subgroup_1 | Probe | NM_014218.2    |
| KIR_Inhibiting_Subgroup_2 | Probe | NM_014511.3    |
| KIR3DL1                   | Probe | NM_013289.2    |
| KIR3DL2                   | Probe | NM_006737.2    |
| KIR3DL3                   | Probe | NM_153443.3    |
| KIT                       | Probe | NM_000222.2    |
| KLRB1                     | Probe | NM_002258.2    |
| KLRC1                     | Probe | NM_002259.3    |
| KLRC2                     | Probe | NM_002260.3    |
| KLRD1                     | Probe | NM_002262.3    |
| KLRF1                     | Probe | NM_016523.1    |
| KLRG1                     | Probe | NM_005810.3    |
| KLRK1                     | Probe | NM_007360.3    |
| LAG3                      | Probe | NM_002286.5    |
| LAIR2                     | Probe | NM_002288.3    |
| LAMP1                     | Probe | NM_005561.3    |
| LAMP2                     | Probe | NM_001122606.1 |
| LAMP3                     | Probe | NM_014398.3    |

|          |       |                |
|----------|-------|----------------|
| LBP      | Probe | NM_004139.2    |
| LCK      | Probe | NM_005356.2    |
| LCN2     | Probe | NM_005564.3    |
| LCP1     | Probe | NM_002298.4    |
| LGALS3   | Probe | NM_001177388.1 |
| LIF      | Probe | NM_002309.3    |
| LILRA1   | Probe | NM_006863.1    |
| LILRA4   | Probe | NM_012276.3    |
| LILRA5   | Probe | NM_181879.2    |
| LILRB1   | Probe | NM_001081637.1 |
| LILRB2   | Probe | NM_005874.1    |
| LILRB3   | Probe | NM_006864.2    |
| LRP1     | Probe | NM_002332.2    |
| LRRN3    | Probe | NM_001099660.1 |
| LTA      | Probe | NM_000595.2    |
| LTB      | Probe | NM_002341.1    |
| LTBR     | Probe | NM_002342.1    |
| LTF      | Probe | NM_002343.2    |
| LTK      | Probe | NM_001135685.1 |
| LY86     | Probe | NM_004271.3    |
| LY9      | Probe | NM_001033667.1 |
| LY96     | Probe | NM_015364.2    |
| LYN      | Probe | NM_002350.1    |
| MAF      | Probe | NM_005360.4    |
| MAGEA1   | Probe | NM_004988.4    |
| MAGEA12  | Probe | NM_001166386.1 |
| MAGEA3   | Probe | NM_005362.3    |
| MAGEA4   | Probe | NM_001011548.1 |
| MAGEB2   | Probe | NM_002364.4    |
| MAGEC1   | Probe | NM_005462.4    |
| MAGEC2   | Probe | NM_016249.3    |
| MAP2K1   | Probe | NM_002755.2    |
| MAP2K2   | Probe | NM_030662.2    |
| MAP2K4   | Probe | NM_003010.2    |
| MAP3K1   | Probe | NM_005921.1    |
| MAP3K5   | Probe | NM_005923.3    |
| MAP3K7   | Probe | NM_145333.1    |
| MAP4K2   | Probe | NM_004579.2    |
| MAPK1    | Probe | NM_138957.2    |
| MAPK11   | Probe | NM_002751.5    |
| MAPK14   | Probe | NM_001315.1    |
| MAPK3    | Probe | NM_001040056.1 |
| MAPK8    | Probe | NM_002750.2    |
| MAPKAPK2 | Probe | NM_004759.3    |
| MARCO    | Probe | NM_006770.3    |
| MASP1    | Probe | NM_139125.3    |

|        |       |                |
|--------|-------|----------------|
| MASP2  | Probe | NM_139208.1    |
| MAVS   | Probe | NM_020746.3    |
| MBL2   | Probe | NM_000242.2    |
| MCAM   | Probe | NM_006500.2    |
| MEF2C  | Probe | NM_002397.3    |
| MEFV   | Probe | NM_000243.2    |
| MERTK  | Probe | NM_006343.2    |
| MFGE8  | Probe | NM_001114614.1 |
| MICA   | Probe | NM_000247.1    |
| MICB   | Probe | NM_005931.3    |
| MIF    | Probe | NM_002415.1    |
| MME    | Probe | NM_000902.2    |
| MNX1   | Probe | NM_005515.3    |
| MPPED1 | Probe | NM_001044370.1 |
| MR1    | Probe | NM_001531.2    |
| MRC1   | Probe | NM_002438.2    |
| MS4A1  | Probe | NM_152866.2    |
| MS4A2  | Probe | NM_000139.3    |
| MSR1   | Probe | NM_002445.3    |
| MST1R  | Probe | NM_002447.1    |
| MUC1   | Probe | NM_001018017.1 |
| MX1    | Probe | NM_002462.2    |
| MYD88  | Probe | NM_002468.3    |
| NCAM1  | Probe | NM_000615.5    |
| NCF4   | Probe | NM_000631.4    |
| NCR1   | Probe | NM_004829.5    |
| NEFL   | Probe | NM_006158.3    |
| NFATC1 | Probe | NM_172389.1    |
| NFATC2 | Probe | NM_012340.3    |
| NFATC3 | Probe | NM_004555.2    |
| NFATC4 | Probe | NM_001136022.2 |
| NFKB1  | Probe | NM_003998.2    |
| NFKB2  | Probe | NM_002502.2    |
| NFKBIA | Probe | NM_020529.1    |
| NLRC5  | Probe | NM_032206.4    |
| NLRP3  | Probe | NM_001079821.2 |
| NOD1   | Probe | NM_006092.1    |
| NOD2   | Probe | NM_022162.1    |
| NOS2A  | Probe | NM_153292.1    |
| NOTCH1 | Probe | NM_017617.3    |
| NRP1   | Probe | NM_003873.5    |
| NT5E   | Probe | NM_002526.2    |
| NUP107 | Probe | NM_020401.2    |
| OAS3   | Probe | NM_006187.2    |
| OSM    | Probe | NM_020530.4    |
| PASD1  | Probe | NM_173493.2    |

|          |       |                |
|----------|-------|----------------|
| PAX5     | Probe | NM_016734.1    |
| PBK      | Probe | NM_018492.2    |
| PDCD1    | Probe | NM_005018.1    |
| PDCD1LG2 | Probe | NM_025239.3    |
| PDGFC    | Probe | NM_016205.2    |
| PDGFRB   | Probe | NM_002609.3    |
| PECAM1   | Probe | NM_000442.3    |
| PIK3CD   | Probe | NM_005026.3    |
| PIK3CG   | Probe | NM_002649.2    |
| PIN1     | Probe | NM_006221.2    |
| PLA2G1B  | Probe | NM_000928.2    |
| PLA2G6   | Probe | NM_001004426.1 |
| PLAU     | Probe | NM_002658.2    |
| PLAUR    | Probe | NM_001005376.1 |
| PMCH     | Probe | NM_002674.2    |
| PNMA1    | Probe | NM_006029.4    |
| POU2AF1  | Probe | NM_006235.2    |
| POU2F2   | Probe | NM_002698.2    |
| PPARG    | Probe | NM_015869.3    |
| PPBP     | Probe | NM_002704.2    |
| PRAME    | Probe | NM_006115.3    |
| PRF1     | Probe | NM_005041.3    |
| PRG2     | Probe | NM_002728.4    |
| PRKCD    | Probe | NM_006254.3    |
| PRKCE    | Probe | NM_005400.2    |
| PRM1     | Probe | NM_002761.2    |
| PSEN1    | Probe | NM_000021.2    |
| PSEN2    | Probe | NM_000447.2    |
| PSMB10   | Probe | NM_002801.2    |
| PSMB7    | Probe | NM_002799.2    |
| PSMB8    | Probe | NM_004159.4    |
| PSMB9    | Probe | NM_002800.4    |
| PSMD7    | Probe | NM_002811.3    |
| PTGDR2   | Probe | NM_004778.1    |
| PTGS2    | Probe | NM_000963.1    |
| PTPRC    | Probe | NM_080921.3    |
| PVR      | Probe | NM_006505.3    |
| PYCARD   | Probe | NM_013258.3    |
| RAG1     | Probe | NM_000448.2    |
| REL      | Probe | NM_002908.2    |
| RELA     | Probe | NM_021975.2    |
| RELB     | Probe | NM_006509.2    |
| REPS1    | Probe | NM_001128617.2 |
| RIPK2    | Probe | NM_003821.5    |
| ROPN1    | Probe | NM_017578.2    |
| RORA     | Probe | NM_134261.2    |

|          |       |                |
|----------|-------|----------------|
| RORC     | Probe | NM_001001523.1 |
| RPS6     | Probe | NM_001010.2    |
| RRAD     | Probe | NM_004165.1    |
| RUNX1    | Probe | NM_001754.4    |
| RUNX3    | Probe | NM_004350.1    |
| S100A12  | Probe | NM_005621.1    |
| S100A7   | Probe | NM_002963.2    |
| S100A8   | Probe | NM_002964.3    |
| S100B    | Probe | NM_006272.1    |
| SAA1     | Probe | NM_199161.1    |
| SBN02    | Probe | NM_014963.2    |
| SELE     | Probe | NM_000450.2    |
| SELL     | Probe | NR_029467.1    |
| SELPLG   | Probe | NM_001206609.1 |
| SEMG1    | Probe | NM_003007.2    |
| SERPINB2 | Probe | NM_002575.1    |
| SERPING1 | Probe | NM_000062.2    |
| SH2B2    | Probe | NM_020979.3    |
| SH2D1A   | Probe | NM_001114937.2 |
| SH2D1B   | Probe | NM_053282.4    |
| SIGIRR   | Probe | NM_021805.2    |
| SIGLEC1  | Probe | NM_023068.3    |
| SLAMF1   | Probe | NM_003037.2    |
| SLAMF6   | Probe | NM_001184714.1 |
| SLAMF7   | Probe | NM_021181.3    |
| SLC11A1  | Probe | NM_000578.2    |
| SMAD2    | Probe | NM_005901.5    |
| SMAD3    | Probe | NM_005902.3    |
| SMPD3    | Probe | NM_018667.3    |
| SOCS1    | Probe | NM_003745.1    |
| SPA17    | Probe | NM_017425.3    |
| SPACA3   | Probe | NM_173847.3    |
| SPANXB1  | Probe | NM_032461.2    |
| SPINK5   | Probe | NM_006846.3    |
| SPN      | Probe | NM_003123.3    |
| SPO11    | Probe | NM_198265.1    |
| SPP1     | Probe | NM_000582.2    |
| SSX1     | Probe | NM_005635.2    |
| SSX4     | Probe | NM_005636.3    |
| ST6GAL1  | Probe | NM_003032.2    |
| STAT1    | Probe | NM_007315.2    |
| STAT2    | Probe | NM_005419.2    |
| STAT3    | Probe | NM_139276.2    |
| STAT4    | Probe | NM_003151.2    |
| STAT5B   | Probe | NM_012448.3    |
| STAT6    | Probe | NM_003153.3    |

|           |       |                |
|-----------|-------|----------------|
| SYCP1     | Probe | NM_003176.2    |
| SYK       | Probe | NM_003177.3    |
| SYT17     | Probe | NM_016524.2    |
| TAB1      | Probe | NM_153497.2    |
| TAL1      | Probe | NM_003189.2    |
| TANK      | Probe | NM_004180.2    |
| TAP1      | Probe | NM_000593.5    |
| TAP2      | Probe | NM_000544.3    |
| TAPBP     | Probe | NM_003190.4    |
| TARP      | Probe | NM_001003799.1 |
| TBK1      | Probe | NM_013254.2    |
| TBX21     | Probe | NM_013351.1    |
| TCF7      | Probe | NM_003202.2    |
| TFE3      | Probe | NM_006521.3    |
| TFEB      | Probe | NM_007162.2    |
| TFRC      | Probe | NM_003234.1    |
| TGFB1     | Probe | NM_000660.3    |
| TGFB2     | Probe | NM_003238.2    |
| THBD      | Probe | NM_000361.2    |
| THBS1     | Probe | NM_003246.2    |
| THY1      | Probe | NM_006288.2    |
| TICAM1    | Probe | NM_014261.1    |
| TICAM2    | Probe | NM_021649.4    |
| TIGIT     | Probe | NM_173799.2    |
| TIRAP     | Probe | NM_148910.2    |
| TLR1      | Probe | NM_003263.3    |
| TLR10     | Probe | NM_030956.2    |
| TLR2      | Probe | NM_003264.3    |
| TLR3      | Probe | NM_003265.2    |
| TLR4      | Probe | NM_138554.2    |
| TLR5      | Probe | NM_003268.3    |
| TLR6      | Probe | NM_006068.2    |
| TLR7      | Probe | NM_016562.3    |
| TLR8      | Probe | NM_016610.2    |
| TLR9      | Probe | NM_017442.2    |
| TMEFF2    | Probe | NM_016192.2    |
| TNF       | Probe | NM_000594.2    |
| TNFAIP3   | Probe | NM_006290.2    |
| TNFRSF10B | Probe | NM_003842.3    |
| TNFRSF10C | Probe | NM_003841.3    |
| TNFRSF11A | Probe | NM_003839.2    |
| TNFRSF11B | Probe | NM_002546.2    |
| TNFRSF12A | Probe | NM_016639.1    |
| TNFRSF13B | Probe | NM_012452.2    |
| TNFRSF13C | Probe | NM_052945.3    |
| TNFRSF14  | Probe | NM_003820.2    |

|          |                    |                |
|----------|--------------------|----------------|
| TNFRSF17 | Probe              | NM_001192.2    |
| TNFRSF18 | Probe              | NM_004195.2    |
| TNFRSF1A | Probe              | NM_001065.2    |
| TNFRSF1B | Probe              | NM_001066.2    |
| TNFRSF4  | Probe              | NM_003327.2    |
| TNFRSF8  | Probe              | NM_152942.2    |
| TNFRSF9  | Probe              | NM_001561.4    |
| TNFSF10  | Probe              | NM_003810.2    |
| TNFSF11  | Probe              | NM_003701.2    |
| TNFSF12  | Probe              | NM_003809.2    |
| TNFSF13  | Probe              | NM_003808.3    |
| TNFSF13B | Probe              | NM_006573.4    |
| TNFSF14  | Probe              | NM_003807.3    |
| TNFSF15  | Probe              | NM_001204344.1 |
| TNFSF18  | Probe              | NM_005092.2    |
| TNFSF4   | Probe              | NM_003326.2    |
| TNFSF8   | Probe              | NM_001244.3    |
| TOLLIP   | Probe              | NM_019009.2    |
| TP53     | Probe              | NM_000546.2    |
| TPSAB1   | Probe              | NM_003294.3    |
| TPTE     | Probe              | NM_199259.2    |
| TRAF2    | Probe              | NM_021138.3    |
| TRAF3    | Probe              | NM_145725.1    |
| TRAF6    | Probe              | NM_145803.1    |
| TREM1    | Probe              | NM_018643.3    |
| TREM2    | Probe              | NM_018965.3    |
| TTK      | Probe              | NM_003318.3    |
| TXK      | Probe              | NM_003328.1    |
| TXNIP    | Probe              | NM_006472.1    |
| TYK2     | Probe              | NM_003331.3    |
| UBC      | Probe              | NM_021009.3    |
| ULBP2    | Probe              | NM_025217.2    |
| USP9Y    | Probe              | NM_004654.3    |
| VCAM1    | Probe              | NM_001078.3    |
| VEGFA    | Probe              | NM_001025366.1 |
| VEGFC    | Probe              | NM_005429.2    |
| XCL2     | Probe              | NM_003175.3    |
| XCR1     | Probe              | NM_005283.2    |
| YTHDF2   | Probe              | NM_001172828.1 |
| ZAP70    | Probe              | NM_001079.3    |
| ZNF205   | Probe              | NM_001031686.1 |
| ABCF1    | Internal Reference | NM_001090.2    |
| AGK      | Internal Reference | NM_018238.3    |
| ALAS1    | Internal Reference | NM_000688.4    |
| AMMECR1L | Internal Reference | NM_001199140.1 |
| CC2D1B   | Internal Reference | NM_032449.2    |



|         |                    |                |
|---------|--------------------|----------------|
| CNOT10  | Internal Reference | NM_001256741.1 |
| CNOT4   | Internal Reference | NM_001190848.1 |
| COG7    | Internal Reference | NM_153603.3    |
| DDX50   | Internal Reference | NM_024045.1    |
| DHX16   | Internal Reference | NM_001164239.1 |
| DNAJC14 | Internal Reference | NM_032364.5    |
| EDC3    | Internal Reference | NM_001142443.1 |
| EIF2B4  | Internal Reference | NM_172195.3    |
| ERCC3   | Internal Reference | NM_000122.1    |
| FCF1    | Internal Reference | NM_015962.4    |
| G6PD    | Internal Reference | NM_000402.2    |
| GPATCH3 | Internal Reference | NM_022078.2    |
| GUSB    | Internal Reference | NM_000181.1    |
| HDAC3   | Internal Reference | NM_003883.2    |
| HPRT1   | Internal Reference | NM_000194.1    |
| MRPS5   | Internal Reference | NM_031902.3    |
| MTMR14  | Internal Reference | NM_022485.3    |
| NOL7    | Internal Reference | NM_016167.3    |
| NUBP1   | Internal Reference | NM_001278506.1 |
| POLR2A  | Internal Reference | NM_000937.2    |
| PPIA    | Internal Reference | NM_021130.2    |
| PRPF38A | Internal Reference | NM_032864.3    |
| SAP130  | Internal Reference | NM_024545.3    |
| SDHA    | Internal Reference | NM_004168.1    |
| SF3A3   | Internal Reference | NM_006802.2    |
| TBP     | Internal Reference | NM_001172085.1 |
| TLK2    | Internal Reference | NM_006852.2    |
| TMUB2   | Internal Reference | NM_024107.2    |
| TRIM39  | Internal Reference | NM_021253.3    |
| TUBB    | Internal Reference | NM_178014.2    |
| USP39   | Internal Reference | NM_001256725.1 |
| ZC3H14  | Internal Reference | NM_001160103.1 |
| ZKSCAN5 | Internal Reference | NM_014569.3    |
| ZNF143  | Internal Reference | NM_003442.5    |
| ZNF346  | Internal Reference | NM_012279.2    |

**Supplementary Table S1: NanoString nCounter® Human PanCancer Immune Profiling Panel.** Table of genes included in the gene expression profiling panel used in this study.

| <b><i>GATA2</i> gene location</b> | <b>Genotype</b>       |                                         |
|-----------------------------------|-----------------------|-----------------------------------------|
| Exon 2                            | c.161C>A              | p.S54X                                  |
| Exon 3                            | c.303delC             | p.A103Qfs*16                            |
|                                   | c.341delA             | p.N114Tfs*5                             |
|                                   | c.351C>G              | p.T117T                                 |
|                                   | c.416_417delCT        | p.S139CfsTer45                          |
|                                   | c.414_417delCTCT      | p.S139CfsX78                            |
|                                   | c.448G>T              | p.G150*                                 |
|                                   | C599delG              | p.G200VfsX18                            |
|                                   | c.599dupG             | p.S201*                                 |
| Exon 4                            | c.981G>A              | p.G327G (within N-ZF)                   |
| Intron 4-5                        | c.1018-10_1037del30bp |                                         |
| Exon 5                            | c.1037_1046del        | p.G346Vfs*38<br>(between C-ZF and N-ZF) |
|                                   | c.1045T>A             | p.C349S (within C-ZF)                   |
|                                   | c.1061C>T             | p.T354M (within C-ZF)                   |
|                                   | c.1084C>T             | p.R362* (within C-ZF)                   |
|                                   | c.1084C>T             | p.R362fsx* (within C-ZF)                |
|                                   | c.1109G>T             | p.C370F (within C-ZF)                   |
|                                   | c.1113C>A             | p.N371K (within C-ZF)                   |
|                                   | c.1128C>G             | p.Y376X (within C-ZF)                   |
| Intron 5-6                        | c.1143+1G>A           |                                         |
| Exon 6                            | c.1186C>T             | p.R396W (within C-ZF)                   |
|                                   | c.1187G>A             | p.R396Q (within C-ZF)                   |
|                                   | c.1215G>T             | p.K405N                                 |

**Supplementary Table S2: Distinct mutations found in pediatric patients with a *GATA2* deficiency and their localization on the *GATA2* gene.** Table of 23 distinct mutations identified in n=25 patients with *GATA2* deficiency. Genotype unknown for n=5 patients. C-ZF: C-zinc finger; N-ZF: N-zinc finger.

| Differentially expressed gene in GATA2-RCC versus GATA2-EB | Log2 fold change GATA2-RCC versus GATA2-EB | Std error (log2) GATA2-RCC versus GATA2-EB |
|------------------------------------------------------------|--------------------------------------------|--------------------------------------------|
| <i>BCL2</i>                                                | -1.200                                     | 0.294                                      |
| <i>BMI1</i>                                                | -1.400                                     | 0.312                                      |
| <i>CCL18</i>                                               | -2.140                                     | 0.232                                      |
| <i>CCRL2</i>                                               | 1.220                                      | 0.281                                      |
| <i>CD34</i>                                                | -3.420                                     | 0.540                                      |
| <i>CXCR1</i>                                               | 1.810                                      | 0.283                                      |
| <i>IFNL1</i>                                               | 0.876                                      | 0.179                                      |
| <i>IL18RAP</i>                                             | 2.860                                      | 0.480                                      |
| <i>LCN2</i>                                                | 2.680                                      | 0.464                                      |
| <i>LGALS3</i>                                              | 2.100                                      | 0.363                                      |
| <i>MEF2C</i>                                               | -1.760                                     | 0.430                                      |
| <i>OSM</i>                                                 | 1.230                                      | 0.250                                      |
| <i>REPS1</i>                                               | -1.310                                     | 0.296                                      |
| <i>TRFC</i>                                                | 2.000                                      | 0.497                                      |
| <i>TXK</i>                                                 | -1.240                                     | 0.278                                      |

**Supplementary Table S3: Gene expression data for the 15 most differentially expressed genes in patients with a GATA2 deficiency in early and advanced disease stage in alphabetical order.** GATA2-RCC: refractory cytopenia of childhood with additional *GATA2* mutation; GATA2-EB: MDS with excess blasts with additional *GATA2* mutation.

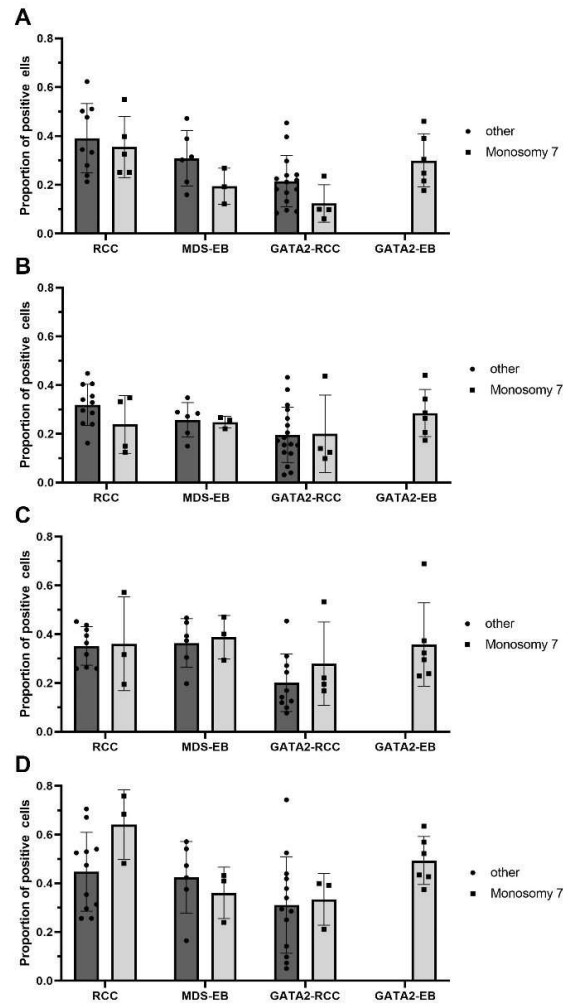

**Supplementary Figure S1: Impact of the karyotype of patients on the expression of GATA2 target genes.** *In situ* hybridization of GATA2 target genes *RUNX1*, *EZH2*, *IKZF1*, and *LYL1* for patients diagnosed with refractory cytopenia of childhood (RCC) or myelodysplastic syndrome with excess blasts (MDS-EB) and patients with RCC or MDS-EB and additional *GATA2* mutation (GATA2-RCC, GATA2-EB). Quantification of *RUNX1*- (A), *EZH2*- (B), *IKZF1*- (C), and *LYL1*-positive cells (D) revealed no statistically significant differences for patients with monosomy 7 or other karyotypes (normal karyotype, trisomy 8 and other cytogenetic aberrations) among pediatric patients. RCC: Monosomy 7 n=5, other n=12; MDS-EB: Monosomy 7 n=3, other n=7; GATA2-RCC: Monosomy 7 n=5, other n=16; GATA2-EB: Monosomy 7 n=6, other n=0.

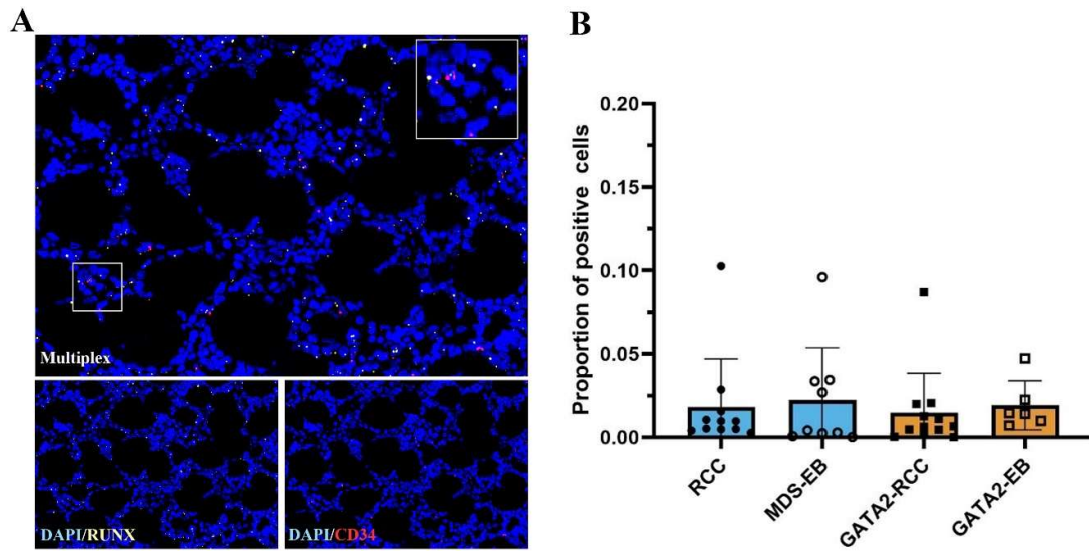

**Supplementary Figure S2: Comparable expression of *RUNX1*-positive hematopoietic progenitors in all patient groups, regardless of *GATA2* mutational status and disease stage.** Multiplex *in situ* hybridization (**A**) of *RUNX1* (yellow) and *CD34* (red) with DAPI counterstain (blue). Quantification of *RUNX1*-positive hematopoietic progenitors (**B**) does not vary across all four patient groups, regardless of *GATA2* mutational status or disease progression.
